# Supplementary material for: Potential Benefits of Incorporating Peer-to-Peer Interactions Into Digital Interventions for Psychotic Disorders: A Systematic Review
Source: Atypon-hosted journal article supplement (doi:10.1176/appi.ps.201700283), 2017-12-15
Supplement: appi.ps.201700283.ds001.pdf [file appi.ps.201700283.ds001.pdf]

## Flow diagram of systematic search for peer-based interventions delivered online and through mobile phones for people with psychotic disorders.

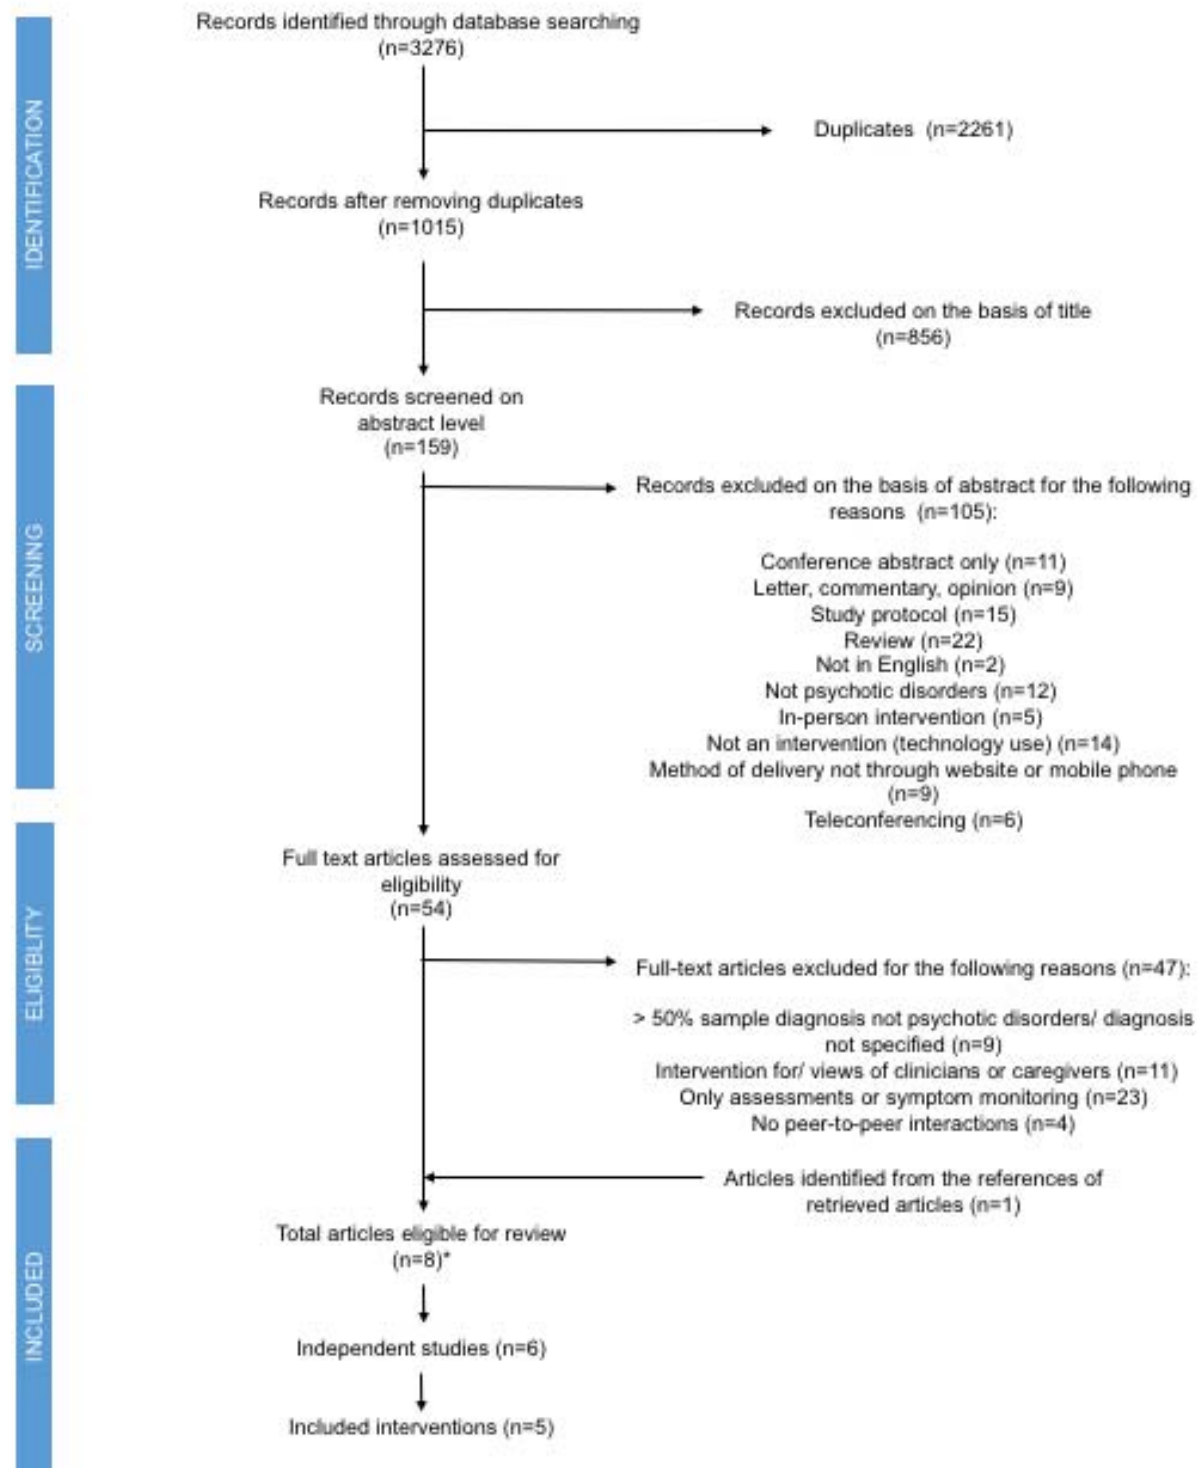

\*two of these articles were secondary reports of other eligible studies

## Characteristics of included studies.

| Studies                                                                       | Author(s), year, location                                                                                  | Intervention                                                                                                                                                                                                                                                                 | Study design                                                     | Duration            | Diagnosis                                                                                                                       | recruitment setting                                                                                                                      | delivery method | Sample size (N)                               | Mean (SD) age, years | Sex (%) (male)                   | Follow-up     | Retention                                     | Adherence                                                                                                                                                                                                                                                                                                                                                                                                                                                             | User experience                                                                                                                                                                                                                                                                                                        | Reported benefits                                                                                                                                                                                                                                                                         |
|-------------------------------------------------------------------------------|------------------------------------------------------------------------------------------------------------|------------------------------------------------------------------------------------------------------------------------------------------------------------------------------------------------------------------------------------------------------------------------------|------------------------------------------------------------------|---------------------|---------------------------------------------------------------------------------------------------------------------------------|------------------------------------------------------------------------------------------------------------------------------------------|-----------------|-----------------------------------------------|----------------------|----------------------------------|---------------|-----------------------------------------------|-----------------------------------------------------------------------------------------------------------------------------------------------------------------------------------------------------------------------------------------------------------------------------------------------------------------------------------------------------------------------------------------------------------------------------------------------------------------------|------------------------------------------------------------------------------------------------------------------------------------------------------------------------------------------------------------------------------------------------------------------------------------------------------------------------|-------------------------------------------------------------------------------------------------------------------------------------------------------------------------------------------------------------------------------------------------------------------------------------------|
| UNNAMED                                                                       | Kaplan et al., 2011, <sup>13</sup> U.S.                                                                    | 2 intervention groups: unmoderated internet peer support listserv (n=101) unmoderated peer support bulletin board (n=99), groups merged in the analysis vs waiting list (n=100)                                                                                              | RCT: 2 conditions: Peer support forum; Waiting list              | 12 months           | Clinician confirmed: schizophrenia spectrum or affective disorder                                                               | Convenience sampling (Websites, e-newsletters, study advertisements via mental health provider agencies and programs)                    | web             | 300                                           | 47                   | 34                               | 4,12 months   | 18% listserv, 10%bulletin board, 12% waitlist | 57/190 (30%) reported having read the messages at least weekly and sent at least 5 messages at the 12 month post baseline point                                                                                                                                                                                                                                                                                                                                       | Perceived relevance, perceived support and satisfaction in the experimental groups were in the mid-range (3.1/6). Participants in the high participation group had significantly higher scores than those who participated less                                                                                        | No differences between 3 groups on quality of life, empowerment scale, and symptoms                                                                                                                                                                                                       |
| <b>Schizophrenia Online Access to Resources (SOAR)<sup>a</sup></b>            | Rotondi et al., 2005, 2010, <sup>14,15</sup> U.S.                                                          | In-person psychoeducation followed by online psychoeducation, therapy groups, moderated peer discussion forums and questions via email                                                                                                                                       | RCT: 2 conditions: Telehealth website; Usual care                | 18 months           | Clinician confirmed: schizophrenia or schizoaffective disorder                                                                  | Referred by staff at inpatient & outpatient psychiatric rehabilitation centers & psychiatric care units                                  | web             | Total: 31<br>Telehealth: 16<br>Usual care: 15 | 38 (11)              | Telehealth: 38<br>Usual care: 27 | 3,6,12 months | 97% retention rate in the experimental arm    | 16/16 (100%) 'engaged' with treatment (contribution in forum on ≥13 visits & use of educational material on ≥4 visits).<br><br>the mean number of therapy forum page views: 1,838 (2,795); the mean number of views on the questions page: 113 (217); the mean number of views on article page: 69 (59)<br><br>the mean amount of time spent online the SOAR therapy forum: 1,874 (2,728); the mean amount of time spent on the educational questions page: 124 (198) | Nearly half of the participants with schizophrenia reported feeling some level of stress (44.7%)<br><br>68.8% to 81.4% participants found SOAR moderately to extremely easy to use.<br><br>93.8% participants would have liked to be involved in SOAR after study conclusion                                           | Reduction in positive symptoms, improvements in perceived social support and stress, and increase in schizophrenia knowledge in intervention group                                                                                                                                        |
|                                                                               | Rotondi et al., 2015, <sup>16</sup> U.S.                                                                   | As above                                                                                                                                                                                                                                                                     | Usability testing of SOAR compared with other websites           | N/A                 | N/A                                                                                                                             | 6 community mental health outpatient psychiatric rehabilitation centers                                                                  | web             | 38                                            | 42.7 (6.62)          | 50                               | N/A           |                                               | N/A                                                                                                                                                                                                                                                                                                                                                                                                                                                                   | Participant ratings (n = 38)<br>4.01/5 – mean rating for 'easy to use'                                                                                                                                                                                                                                                 | Easiest application to use of the 5 websites reviewed                                                                                                                                                                                                                                     |
| <b>HORYZONS</b>                                                               | Alvarez-Jimenez et al., 2013, <sup>17</sup> Australia<br><br>Gleeson et al., 2013, <sup>18</sup> Australia | Online interactive psychosocial interventions & moderated social networking                                                                                                                                                                                                  | Uncontrolled pilot study (quantitative and qualitative analysis) | 4 weeks (7 modules) | clinician confirmed: FEP or mood disorder with psychotic features                                                               | Early Psychosis Prevention and Intervention Centre (EPPIC, Melbourne)                                                                    | web             | 20                                            | 20.3 (2.7)           | 50                               | 1 month       | 100%                                          | 12/20 - used HORYZONS for full 4 weeks (60%);<br>14/20 - used HORYZONS for ≥3 weeks (70%).<br>3/20 - completed all 7 modules (15%);<br>9/20 - completed ≥4 modules (45%);<br>12/20 - completed ≥3 modules (60%);<br>19/20 - completed ≥1 module (95%)<br><br>95% used the social network with a total of 371 postings and 4170 social page views or actions                                                                                                           | 15/20 - had a positive experience (75%);<br>18/20 - would recommend to others (90%);<br>14/20 - felt it would be a useful long-term treatment option (70%).<br><br>20/20 - 'agreed' or 'strongly agreed' that HORYZONS was safe & confidential (100%);<br><br>18/20 - felt moderation had contributed to safety (90%). | after 1-month using the online platform: moderate to large reductions in depression.<br><br>60% of patients reported increased perceived social connectedness and<br><br>55% felt empowerment in their recovery process<br><br>70% found the system to be useful, beyond their discharge. |
| <b>Personalized Real-Time Intervention for Motivation Enhancement (PRIME)</b> | Schlosser et al., 2016, <sup>19</sup> U.S.                                                                 | SMS-based motivational coaching from trained therapists; individualized goal setting in various psychosocial domains; and social networking via direct peer-to-peer messaging, community "moments feed" to capture and reinforce rewarding experiences and goal achievements | Uncontrolled pilot study                                         | 12-weeks            | Clinician confirmed: schizophrenia, schizophreniform, or schizoaffective disorder, within the first 5 years of formal diagnosis | Early Psychosis Clinic at University of California, San Francisco, community-based treatment providers<br><b>websites, e-newsletters</b> | mobile          | 20                                            | 23.4 (3.2)           | 85                               | 3 months      | 100%                                          | average number of logins per week: 4.1, challenge completion rate (%): 84.9%, average number of user-initiated peer interactions: 74.2, average number of user-initiated coach interactions: 56.6, average number of challenges completed: 19.4, average times active per week: 7.52.                                                                                                                                                                                 | Mean overall satisfaction 8/10                                                                                                                                                                                                                                                                                         | n/a                                                                                                                                                                                                                                                                                       |
| <b>Creating Live Interactions to Mitigate Barriers (CLIMB)</b>                | Biagianni et al., 2016, <sup>20</sup> U.S.                                                                 | Computerized social cognition training program, remote weekly group therapy sessions, and moderated group texting                                                                                                                                                            | Uncontrolled pilot study                                         | 6 weeks             | Clinician confirmed: Schizophrenia, Schizoaffective Disorder, or bipolar with psychotic features                                | Convenience sampling (Websites, e-newsletters, study advertisements via mental health provider agencies and programs).                   | mobile          | 27                                            | 28.1 (6.4)           | 63                               | n/a           | 78%                                           | Participants attended 84% of the group therapy sessions, completed a median of 9.5 hours of training, and posted a median of 5.2 messages per week on the group text chat.                                                                                                                                                                                                                                                                                            | Participant ratings (n=21)<br>Enjoyment/Satisfaction 2.99/5<br>Program Clarity / Ease of use 4.18 /5<br>Ease of fit into daily schedule 2.91/5<br>Perceived benefits 3.25/5                                                                                                                                            | Significant pre- to post improvements in social emotion identification abilities. Trend-level improvements on aspects of quality of life. No improvements for symptoms.                                                                                                                   |

<sup>a</sup> Study included data from caregivers or clinicians, or both; results from these participants are not reported in this review.  
US: United States; RCT: Randomized Clinical Trial
